# Supplementary material for: Composition and cycling of dissolved organic matter from tropicalpeatlands of coastal Sarawak, Borneo, revealed by fluorescencespectroscopy and PARAFAC analysis
Source: Copernicus journal article supplement (doi:10.5194/bg-2018-508), 2018-12-18
Supplement: Supplementary file 1 [file bg-2018-508-supplement.zip]

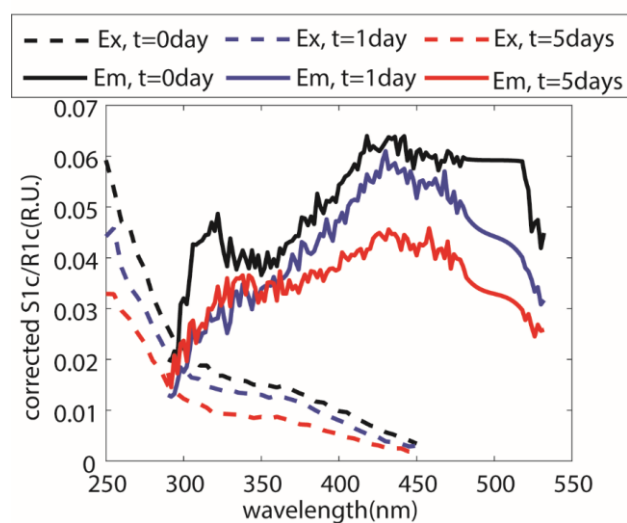

**Figure S2.** An example of the evolution of the excitation spectra emitted at 500nm and emission spectra excited at 250nm of a sample collected from eastern region seawater during the photodegradation experiment. The wavelengths for examination were selected based on Helms et al. (2013).
