# Supplementary material for: Composition and cycling of dissolved organic matter from tropicalpeatlands of coastal Sarawak, Borneo, revealed by fluorescencespectroscopy and PARAFAC analysis
Source: Copernicus journal article supplement (doi:10.5194/bg-2018-508), 2018-12-18
Supplement: Supplementary file 2 [file bg-2018-508-supplement.zip]

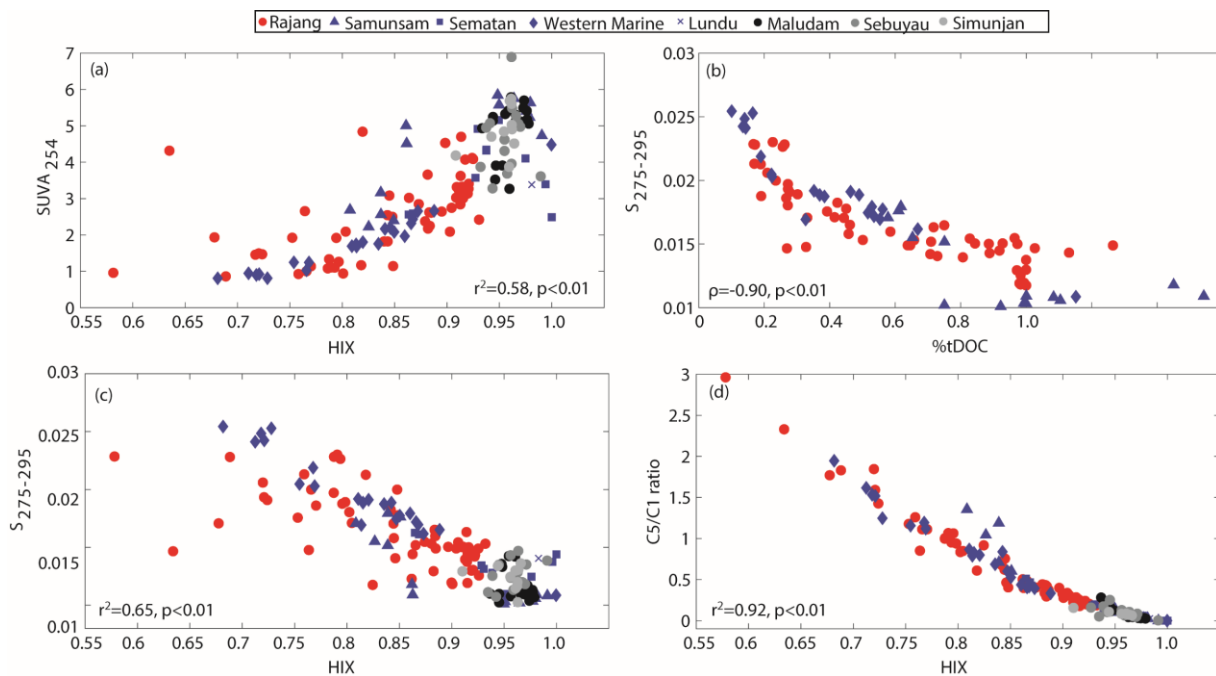

**Figure S1.** Correlations between (a) SUVA<sub>254</sub> and HIX, (b) between  $S_{275-295}$  and estimated %DOC, (c) between  $S_{275-295}$  and HIX, (d) between C5/C1 Fmax ratio and HIX. Correlations in panel (a), (c), (d) were calculated as Pearson's correlation while correlation in panel (b) was calculated as Spearman's rank correlation.
